# Supplementary material for: Pioglitazone ameliorates the phenotype of a novel Parkinson’s disease mouse model by reducing neuroinflammation
Source: Springer Nature journal article supplement (doi:10.1186/s13024-016-0090-7), 2016-04-02
Supplement: MOESM2 [file 10027840]

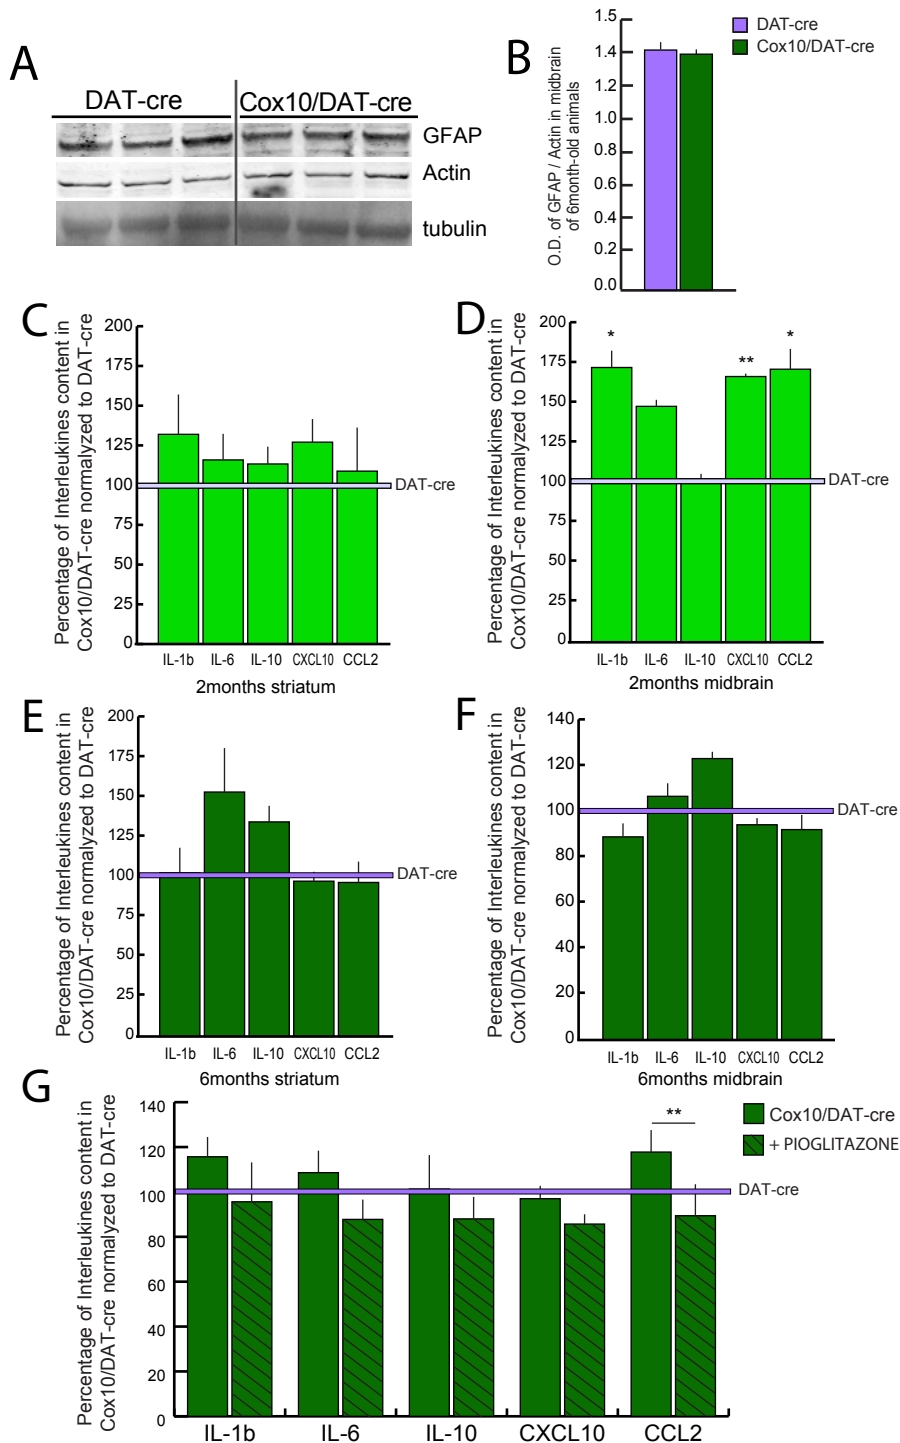

**Supplementary figure S1. Pro-inflammatory cytokines are increased in Cox10/DAT-cre mice and decrease after Pioglitazone treatment.**

A: Western blotting probing for markers of neuroinflammation GFAP in midbrain homogenates of DAT-cre and Cox10/DAT-cre mice. B: Western quantification shows no change in GFAP signal. C-D: Percentage of pro-inflammatory cytokines content in striata (C) and midbrain (D) of 2-month-old Cox10/DAT-cre animals, normalized for cytokine content measured in DAT-cre mice. E-F: Percentage of pro-inflammatory cytokines content in striata (E) and midbrain (F) of 6-month-old Cox10/DAT-cre animals, normalized for cytokine content measured in DAT-cre mice. G: Percentage of pro-inflammatory cytokines content in striata of 6-month-old Cox10/DAT-cre animals untreated and treated with Pioglitazone, normalized for cytokine content measured in DAT-cre mice.
